# Supplementary material
Source: PubMed Central journal article supplement (PMC4850283)
Supplement: 10.1074_M115.708958_jbc.M115.708958-1.pdf [file 10.1074_M115.708958_jbc.M115.708958-1.pdf]

## SUPPLEMENTAL INFORMATION

## Carbohydrate-Carbohydrate Interactions Mediated by Sulfate Esters and Calcium Provide the Cell Adhesion Required for the Emergence of Early Metazoans

**Eduardo Vilanova<sup>a</sup>, Gustavo R. C. Santos<sup>a</sup>, Rafael S. Aquino<sup>a</sup>, Juan J. Valle-Delgado<sup>b,c,d</sup>, Dario Anselmetti<sup>e</sup>, Xavier Fernàndez-Busquets<sup>b,c,d</sup> and Paulo A. S. Mourão<sup>a</sup>**

From the <sup>a</sup>Hospital Universitário Clementino Fraga Filho and Instituto de Bioquímica Médica Leopoldo de Meis, Universidade Federal do Rio de Janeiro (UFRJ), Rio de Janeiro 21941-913, Brazil; <sup>b</sup>Nanomalaria Group, Institute for Bioengineering of Catalonia (IBEC), Barcelona 08028, Spain; <sup>c</sup>Barcelona Institute for Global Health (ISGlobal), Hospital Clínic-Universitat de Barcelona, Barcelona 08036, Spain; <sup>d</sup>Nanoscience and Nanotechnology Institute (IN2UB), University of Barcelona, Barcelona 08028, Spain and <sup>e</sup>Experimental Biophysics and Applied Nanoscience, Faculty of Physics, Bielefeld University, Bielefeld 33615, Germany.

## List of supplemental data

|                                                                                                                 |                      |
|-----------------------------------------------------------------------------------------------------------------|----------------------|
| <sup>1</sup> H and <sup>13</sup> C chemical shifts for residue of $\alpha$ -glucose in DaSP                     | Supplemental table 1 |
| <sup>1</sup> H and <sup>13</sup> C chemical shifts for residue of $\alpha$ -fucose in DaSP                      | Supplemental table 2 |
| <sup>1</sup> H and <sup>13</sup> C chemical shifts for residue of $\alpha$ -galactose in DaSP                   | Supplemental table 3 |
| Contact point between residues of DaSP based on <sup>13</sup> C- <sup>1</sup> H HMBC spectrum                   | Supplemental table 4 |
| <sup>1</sup> H and <sup>13</sup> C chemical shifts of the correlation peaks, $\delta$ H/ $\delta$ C of pyruvate | Supplemental table 5 |
| AFM DFS data                                                                                                    | Supplemental table 6 |

Table S-1. <sup>1</sup>H and <sup>13</sup>C chemical shifts (ppm) for residue of α-glucose in DaSP and standard compounds.

| Unit               | A                             | B                                                 | C                 | F                                            | G                 | Standard compounds      |                         |                                                                    |                                                                    |
|--------------------|-------------------------------|---------------------------------------------------|-------------------|----------------------------------------------|-------------------|-------------------------|-------------------------|--------------------------------------------------------------------|--------------------------------------------------------------------|
| Proposed structure | →3-α-Glc1→                    | →3-α-Glc-2,4 di (SO <sub>3</sub> <sup>-</sup> )1→ | →3,4-α-Glc1→      | →3-α-Glc-4 (SO <sub>3</sub> <sup>-</sup> )1→ | →3-α-Glc1→        | α-Glc-O-Me <sup>a</sup> | →3-α-Glc1→ <sup>a</sup> | →3-α-Glc-2,4,6 tri(SO <sub>3</sub> <sup>-</sup> )1→ <sup>b,c</sup> | →3-α-Glc-2,4,6 tri(SO <sub>3</sub> <sup>-</sup> )1→ <sup>d,c</sup> |
| H1/C1              | 5.33/100.06                   | 5.7/97.06                                         | 5.33/99.15        | 5.28/99.71                                   | 5.40/98           | 4.81/100.19             | 5.33/100.6              | 97.1                                                               | 99.0                                                               |
| H2/C2              | 3.64/70.06                    | <b>4.25/76.49</b>                                 | 3.70/71.30        | 3.70/71.19                                   | 3.79/70.91        | 3.56/72.23              | 3.68/71.26              | <b>77.4</b>                                                        | <b>78.3</b>                                                        |
| H3/C3              | <b>3.87/81.52<sup>a</sup></b> | <b>3.95/80.01</b>                                 | <b>3.94/80.87</b> | <b>3.89/80.83</b>                            | <b>3.83/80.79</b> | 3.69/74.10              | <b>3.90/81.32</b>       | <b>81.4</b>                                                        | <b>83.7</b>                                                        |
| H4/C4              | 3.72/70.42                    | <b>4.23/76.49</b>                                 | <b>3.98/77.88</b> | <b>4.22/76.61</b>                            | 3.61/70.83        | 3.41/70.68              | 3.69/70.71              | <b>75.4</b>                                                        | <b>76.2</b>                                                        |
| H5/C5              | 3.98/72.13                    | 4.20/72.50                                        | 4.07/71.96        | 3.99/72.13                                   |                   | 3.64/75.52              | 3.99/72.58              | 71.6                                                               | 74.1                                                               |
| H6/C6              | ~3.76-3.85/61.2               | ~3.70-3.8/60.69                                   | ~3.76-3.85/61.2   |                                              | ~3.76-3.85/61.2   | 3.64-3.87/61.87         | 3.78-3.85/61.36         | <b>67.1</b>                                                        | <b>69.6</b>                                                        |

<sup>a</sup> Data from Lundborg and Widmalm (41).

<sup>b</sup> Data from Huang and Zhang (42).

<sup>c</sup> <sup>13</sup>C chemical shifts.

<sup>d</sup> Data from Bao et al (43).

Glycosylation and sulfation sites in blue and red, respectively.

Table S-2.  $^1\text{H}$  and  $^{13}\text{C}$  chemical shifts (ppm) for residue of  $\alpha$ -fucose in DaSP and standard compounds.

| Unit               | D                                                                      | Standard Compounds                                                                |                                                                 |                                                                 |
|--------------------|------------------------------------------------------------------------|-----------------------------------------------------------------------------------|-----------------------------------------------------------------|-----------------------------------------------------------------|
| Proposed structure | $\rightarrow 3\text{-}\alpha\text{-Fuc-2 (SO}_3^-)\text{1}\rightarrow$ | $\rightarrow 3\text{-}\alpha\text{-Fuc-2 (SO}_3^-)\text{1}\rightarrow^{\text{a}}$ | $\rightarrow 3\text{-}\alpha\text{-Fuc1}\rightarrow^{\text{b}}$ | $\rightarrow 4\text{-}\alpha\text{-Fuc1}\rightarrow^{\text{c}}$ |
| H1/C1              | 5.46/96.34                                                             | 5.33/96.6                                                                         | 5.03/98.23                                                      | 5.07/103.50                                                     |
| H2/C2              | <b>4.41/73.45</b>                                                      | <b>4.55/75.56</b>                                                                 | 3.96/69.05                                                      | 3.95/71.35                                                      |
| H3/C3              | <b>4.10/70.69</b>                                                      | <b>4.10/75.9</b>                                                                  | <b>4.01/77.66</b>                                               | 4.08/67.69                                                      |
| H4/C4              | 3.93/72.68                                                             | 4.07/71.20                                                                        | 3.96/71.11                                                      | <b>3.97/82.75</b>                                               |
| H5/C5              | 4.23/70.9                                                              | 4.42/68.60                                                                        | 4.52/69.05                                                      | 4.58/70.02                                                      |
| H6/C6              | 1.23/16                                                                | 1.25/17.30                                                                        | 1.21/17.90                                                      | 1.37/13.00                                                      |

<sup>a</sup> Data from Pereira et al (44).

<sup>b</sup> Data from Alves et al (45).

<sup>c</sup> Data from Vilela-Silva et al (40).

Glycosylation and sulfation sites in blue and red, respectively.

Table S-3.  $^1\text{H}$  and  $^{13}\text{C}$  chemical shifts (ppm) for residue of  $\alpha$ -galactose in DaSP and standard compounds.

| Unit               | E                                                  | Standard compounds                                         |                                                            |                                 |                                                  |
|--------------------|----------------------------------------------------|------------------------------------------------------------|------------------------------------------------------------|---------------------------------|--------------------------------------------------|
| Proposed structure | $\alpha$ -Gal1 $\rightarrow$                       | $\rightarrow$ 4- $\alpha$ -Gal1 $\rightarrow$ <sup>a</sup> | $\rightarrow$ 3- $\alpha$ -Gal1 $\rightarrow$ <sup>b</sup> | $\alpha$ -Gal-O-Me <sup>c</sup> | $\alpha$ -Gal-4,6-Py1 $\rightarrow$ <sup>c</sup> |
| H1/C1              | 5.11/99.35                                         | 5.03/101.3                                                 | 5.26/98.1                                                  | 4.85/100.32                     | 5.12/96.52                                       |
| H2/C2              | 3.74/69.18                                         | 3.84/70.0                                                  | 4.08/73.5                                                  | 3.84/69.17                      | 3.93/68.56                                       |
| H3/C3              | 4.08/68.90                                         | 3.95/70.0                                                  | <b>4.14/77.2</b>                                           | 3.81/70.46                      | 3.96/68.38                                       |
| H4/C4              | <b>3.99/70.01</b><br><b>4.43/68.95<sup>d</sup></b> | <b>4.13/79.8<sup>d</sup></b>                               | 4.32/69.5                                                  | 3.99/70.19                      | <b>4.20/71.90</b>                                |
| H5/C5              | Nd                                                 | 4.34/70.0                                                  | 4.24/68.2                                                  | 3.89/71.54                      | 3.91/62.97                                       |
| H6/C6              | <b>3.80-3.95/61.5</b>                              | 3.81/61.5                                                  | 3.82/63.9                                                  | 3.76/62.06                      | <b>3.82-4.00/65.17</b>                           |

<sup>a</sup> Data from Pavão et al (46).

<sup>b</sup> Data from Alves et al (45).

<sup>c</sup> Data from Lundborg and Widmalm (41).

<sup>d</sup> Pyruvated site.

Glycosylation and pyruvated sites in blue and green, respectively.

Table S-4. Contact points between residues of DaSP based on  $^{13}\text{C}$ - $^1\text{H}$  HMBC spectrum.

| Inter-residue contact                        | Value in ppm (C-H) |
|----------------------------------------------|--------------------|
| E ( $^{13}\text{C}1$ ) - D ( $^1\text{H}3$ ) | 99.35-4.10         |
| D ( $^{13}\text{C}1$ ) - F ( $^1\text{H}3$ ) | 96.34-3.89         |
| F ( $^{13}\text{C}1$ ) - G ( $^1\text{H}3$ ) | 99.71-3.83         |
| G ( $^{13}\text{C}1$ ) - C ( $^1\text{H}3$ ) | 98-3.98            |
| C ( $^{13}\text{C}1$ ) - B ( $^1\text{H}3$ ) | 99.15-3.95         |
| A ( $^{13}\text{C}1$ ) - A ( $^1\text{H}3$ ) | 99.15-3.87         |
| B ( $^{13}\text{C}1$ ) - A ( $^1\text{H}3$ ) | 97.06-3.87         |
| A ( $^{13}\text{C}1$ ) - B ( $^1\text{H}3$ ) | 100.06-3.95        |
| A ( $^{13}\text{C}1$ ) - C ( $^1\text{H}3$ ) | 100.06-3.94        |

Table S-5.  $^1\text{H}$  and  $^{13}\text{C}$  chemical shifts (ppm) of the correlation peaks,  $\delta\text{H}/\delta\text{C}$  (ppm), of pyruvate involved in cyclic ketals with non-reducing terminal galactose derived from the  $^1\text{H}/^{13}\text{C}$  HMBC spectra.

| Chemical group  | Pyruvated galactose in DaSP | Reference values                            |                                               |
|-----------------|-----------------------------|---------------------------------------------|-----------------------------------------------|
|                 |                             | Six-membered ring (O-4 and O-6 substituted) | Five-membered ring (O-3 and O-4 substituted)  |
| CH <sub>3</sub> | 1.48/25.3                   | 1.45/25.49 <sup>a</sup>                     | 1.62/26.4 <sup>b</sup> 1.77/23.4 <sup>c</sup> |
| O-C-O           | 1.48/101.2                  | 1.45/102.10                                 | 1.62/108.3 1.77/109.1                         |
| COOH            | 1.48/175.2                  | 1.45/175.2                                  | 1.62/178.5 1.77/186.6                         |

<sup>a</sup> Data from Lundborg and Widmalm (41) for pyruvate linked to terminal  $\alpha$ -galactose.

<sup>b</sup> Data from Bilan et al (47).

<sup>c</sup> Data from Farias et al (48).

Table S-6. AFM DFS data for the self-interactions of native (Nat), carboxyl-reduced (CR) and desulfated (Des) DaSP in the presence ( $\text{Ca}^{++}$ ) and absence (EDTA) of calcium.

|                       | $k_{\text{off}} (\text{s}^{-1})^{\text{a,b}}$ | $X_{\beta} (\text{\AA})^{\text{c,b}}$ | $\tau (\text{s})^{\text{d}}$ |
|-----------------------|-----------------------------------------------|---------------------------------------|------------------------------|
| Nat/ $\text{Ca}^{++}$ | $1.39 \pm 1.22 \times 10^{-3}$                | $3.65 \pm 0.51$                       | 718.8                        |
| Nat/EDTA              | $0.41 \pm 0.29$                               | $2.10 \pm 0.16$                       | 2.4                          |
| CR/ $\text{Ca}^{++}$  | $1.37 \pm 1.18 \times 10^{-3}$                | $3.49 \pm 0.59$                       | 729.9                        |
| CR/EDTA               | $0.39 \pm 0.20$                               | $2.15 \pm 0.17$                       | 2.5                          |
| Des/ $\text{Ca}^{++}$ | $0.36 \pm 0.23$                               | $2.40 \pm 0.25$                       | 2.7                          |
| Des/EDTA              | $0.40 \pm 0.28$                               | $2.22 \pm 0.18$                       | 2.5                          |

<sup>a</sup>  $k_{\text{off}}$  = thermal off-rate constant under zero external load.

<sup>b</sup> Data expressed as mean  $\pm$  SD.

<sup>c</sup>  $x_{\beta}$  = reaction length.

<sup>d</sup>  $\tau$  = mean lifetime of the complex.
